# Supplementary material
Source: Springer Nature journal article supplement (https://www.springermedizin.de/resource/supplementary/13569_2013_51_MOESM2_ESM.pdf/9676712)

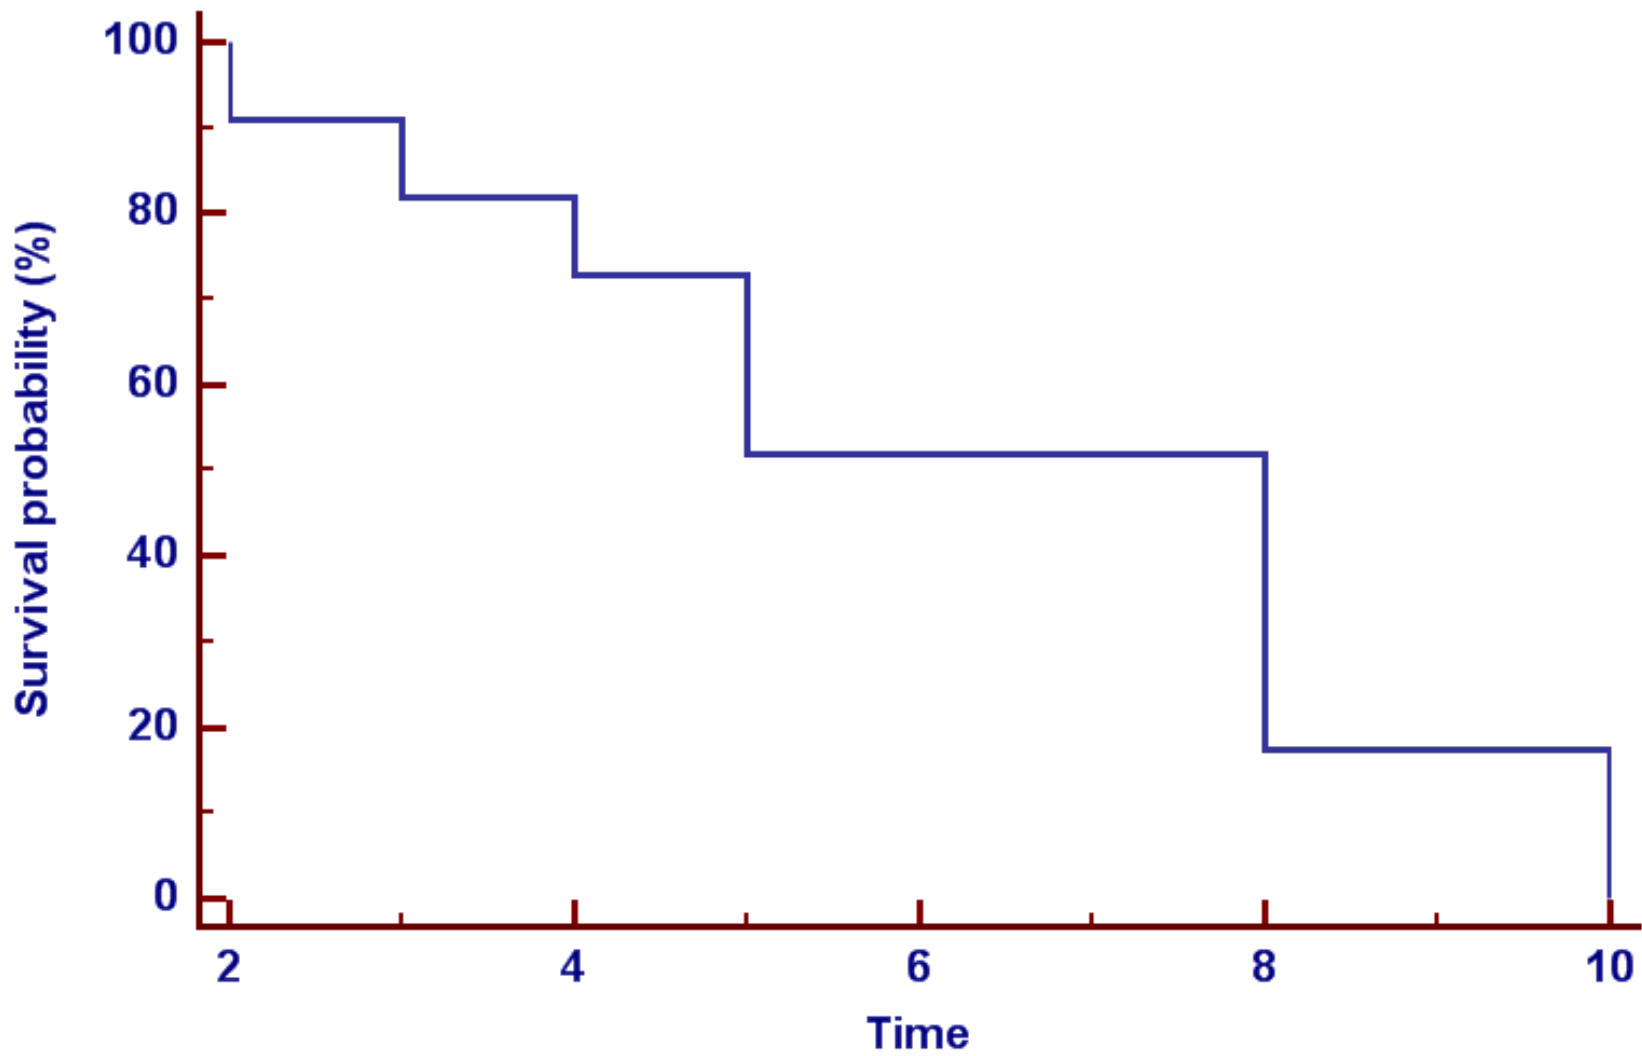

Number at risk  
10                      7                      5                      1                      0

Supplement: MOESM2 [file 9676712]
